# Supplementary material
Source: publisher site journal article supplement (https://www.dovepress.com/article/459946)
Supplement: Supplementary file 1 [file get_supplementary_file.php]

**Supplementary Table 1:** Summary Table

| **- Reference**  **- Year**  **- Country** | **- Study Design**  **- Sample Size**  **- Focus Population**  **- Age (Mean)** | **Objective** | **- Artificial Intelligence (AI) included in the study**  **- Nursing Care Involved** | **Results** | **AI in Nursing Care (Theme)** | **Suggestions for future research** |
| --- | --- | --- | --- | --- | --- | --- |
| 1  2019  USA | - Retrospective study  - 2,165  - Adult patients discharged from medical services  from August 1, 2017 through October 31, 2017 (Not specific diagnosis)  - 63.6 year (mean) | To identify patients at risk for readmission by applying a machine learning technique, Classification and Regression Tree (CART) to electronic health record (EHR) data | - CART  - Improve the quality of nursing care delivery for patients at the highest readmission risk | - The 30-day readmission rate was 11.2% - CART analysis revealed the highest risk for readmission among patients who visited the emergency department, had ≥ 9 comorbidities, were insured through Medicaid, and were ≥ 65 years old | - Risk identification | Refining predictive models using EHR data and machine learning has successfully identified a patient profile, incorporating both social and medical factors, to predict 30-day readmissions. This algorithm positions us to strategically allocate nursing resources to a targeted patient population, enhancing the efficiency and precision of care delivery. Focus on real-time integration, long-term outcome assessments, and exploring patient-centered and cost-effectiveness perspectives will further optimize the practical implementation of this algorithm, ensuring its sustained impact on healthcare outcomes. |
| 2  2023  UK | - Discussion paper  - N/A  - Patient with a mental health issue  - N/A | To use artificial intelligence (ChatGPT) to create a mental health nursing care  plan and evaluate the output quality against the authors’ clinical experience and existing guidance | - ChatGPT  - Create a mental health nursing care plan and evaluate the output quality | - ChatGPT provided a care plan incorporating some dialectical behavior therapy principles - However, the output had significant errors and limitations | - Develop a nursing care plan | Future research in nursing care should concentrate on refining and optimizing AI applications, particularly in generating mental health nursing care plans. Investigations should address the identified errors and limitations of current AI models, aligning generated care plans with clinical expertise and established guidance. Additionally, research should explore the impact of AI on the relational aspects of mental health nursing and its broader implications for patient engagement and recovery. Prioritizing the development of policies and guidelines will be essential to safeguard the well-being of care recipients before widespread AI implementation in mental health care. |
| 3  2021  USA | - Multiple-case diagnosis study  - 1,048  - Patients with skin conditions  - 43 (30-56) (median, IQR) | To evaluate an AI-based tool that assists with diagnoses of  dermatologic conditions | - Deep Learning  - Assists nurse practitioners with evaluation/diagnosis of  dermatologic conditions | - AI assistance was significantly associated with a higher agreement with diagnoses made by a dermatologist panel, with an increase from 48% to 58% for primary care physicians and an increase from 46% to 58% for nurse practitioners | - Health assessment | - Future nursing research should investigate the potential applications of AI in diverse healthcare contexts, building on the success observed in dermatologic care. Studies should focus on refining AI algorithms for nursing tasks and exploring their impact on diagnostic accuracy, nursing workflow, and patient outcomes. Understanding the interaction dynamics between nurses and AI tools is crucial, ensuring that integration enhances rather than diminishes the relational aspects of nursing care. - Developing guidelines for the ethical use of AI in nursing practice is essential to safeguard patient well-being. Overall, research should aim to optimize the synergy between nursing expertise and AI capabilities for more effective, patient-centered care. |
| 4  2023  China | - Tool development  - 60  - Stroke (not specify)  - N/A | To combine regression model with support vector machine (SVM) to build an intelligent wearable device system and prediction module to predict patient care needs | - SVM  - Predict nursing care needed in stroke patients (e.g., physical function, pain, medication taking) | - The application of wearable devices can improve the recovery of a patient’s physiological functions, body pain, and vitality - Improve patient health indicators so that patients know when to start exercising, how long, and how often they exercise, which helps cultivate healthy behaviors and habits - Reminding patients of the medication time through wearable smart devices can make patients intuitively feel the importance of regular medication | - Develop a nursing care plan | Future research should expand on the integration of machine learning and smart wearable devices for stroke care. Refining machine learning models, studying long-term impact, and assessing device usability are key areas. Additionally, addressing ethical considerations and data security is crucial for the effective and ethical implementation of these technologies in nursing care. |
| 5  2023  USA | - The exploratory study  - 3,438  - Adult patients with different conditions  - N/A | - To generate a pragmatic example of how machine learning could be used to quickly and meaningfully cohort patients using unsupervised classification methods - To demonstrate the increased translational value of machine learning models by integrating nursing knowledge | - Unsupervised classification methods (clustering)  - Identifying high-need primary care patients by integrating nursing knowledge and machine learning approach | Four distinct clusters were interpreted and mapped to psychosocial need profiles, allowing for immediate translation to clinical practice by creating actionable social and medical care plans.   - 1) A large cluster of racially diverse female, non-English speakers with low medical complexity and a history of childhood illness - 2) a large cluster of English speakers with significant comorbidities (obesity and respiratory disease) - 3) a small cluster of males with substance use disorder and significant comorbidities (mental health, liver, and cardiovascular disease) who frequently visit the hospital - 4) a moderate cluster of older, racially diverse patients with renal failure | - Risk identification - Develop a nursing care plan | Future research in nursing care should build upon the successful integration of machine learning and nursing knowledge demonstrated in patient cohorts. This collaborative approach could be explored in diverse patient populations and healthcare settings, with a focus on developing standardized frameworks. Evaluating the long-term impact of generated care plans and addressing ethical considerations in data privacy and machine learning applications are crucial for advancing this integrated approach in evidence-based nursing care. |
| 6  2023  Indonesia | - Commentary  - N/A  - N/A  - N/A | To explore and discuss the impact of applying AI in nursing science and the healthcare system to provide approximate nursing care | - Not specify  - The utilization of AI technology in the scope of nursing care includes expanding access to quality medical care, improving medical records, and improving the quality of services | - The current evaluation of AI technology systems in nursing and healthcare reveals several notable impacts. These include expanded access to quality medical care, enhancements in medical record management, and overall improvements in service quality - These positive effects underscore the advantages and the pressing need for integrating AI technology systems in healthcare, aiming to optimize healthcare services for greater efficiency and effectiveness | - Improved care delivery and medical record | Future studies should concentrate on refining AI integration to maximize positive impacts, including expanded access to quality medical care and improved service quality. Addressing challenges such as biases and algorithmic issues is crucial, requiring proactive measures and updates to minimize errors in AI-driven healthcare systems. Understanding the nuances of AI's impact on nursing practice and patient outcomes will inform evidence-based strategies, contributing to the ongoing evolution of AI integration for more efficient healthcare delivery. |
| 7  2020  USA | - Retrospective study  - 2,165  - Adult patients with different conditions  - 63.6 year (mean) | To identify patients at risk for readmission by applying a machine-learning technique,  CART | - CART  - Offer promising approaches to identify high-risk patients and inform nursing practice | - The 30-day readmission rate was 11.2% (n = 242) - CART analysis revealed the highest risk for readmission among patients who visited the emergency department, had nine or more comorbidities, were insured through Medicaid, and were 65 years of age and older | - Risk identification | Future research in nursing care should refine and expand machine learning models for identifying high-risk patients for readmissions using EHR. Investigations should focus on the algorithm's generalizability across diverse healthcare settings and patient populations, exploring real-time implementation and integration into nursing workflows. The development of personalized care plans based on identified risk factors and addressing ethical considerations, privacy safeguards, and patient engagement are key areas for further exploration, ultimately aiming to enhance patient outcomes and improve the quality of nursing care delivery. |
| 8  2021  China | - Cross-sectional study  - 300  - Adult patients who met the Chinese critical care criteria  - 56.48 years (mean) | To develop a patient classification system that stratifies patients admitted to the intensive care unit based on their disease severity and care needs | - Unsupervised classification methods (clustering)  - The patient classification system can help nurse managers identify homogeneous patient groups and further improve the management of critically ill patients | - Cluster analysis identified three sub-groups of critically ill patients with different levels of clinical trajectories - The subgroups were significantly different according to disease severity and nursing workload - The predicted value ranges of the regression model for Classes A, B, and C were < 1.44, 1.44 - 2.03, and > 2.03 - The model was shown to have a good fit and satisfactory prediction efficiency using 200 permutation tests | - Patient classification | The study focuses on refining and expanding the application of the developed patient classification system for intensive care units. Investigating its long-term impact and scalability across diverse settings and patient populations is crucial. Additionally, exploring real-time data integration and dynamic adjustment capabilities could enhance the system's adaptability. Ethical considerations and patient engagement strategies should be integral to further research, ensuring responsible implementation. The overarching goal is to advance the practical integration of the classification system into nursing workflows, ultimately improving patient outcomes and enhancing the quality of intensive care nursing. |
| 9  2019  USA | - Methodological research  - N/A  - Older adults with chronically ill  - N/A | To offer practical guidance to nurse investigators interested in multi-disciplinary research that includes assisting in developing AI algorithms for “smart” health management and aging-in-place | - Intelligent algorithms (not specified)  - Practical frameworks to guide nurse investigators integrating clinical  data with sensor data for training machine learning algorithms may build the capacity for nurses to make significant contributions to developing AI for healthcare-assistive smart homes | - Nurses assisting with the development of health-assistive AI encounter unique challenges and opportunities - The researcher recommends 1) using a practical and consistent method for collecting field data, 2) using nurse-driven measures for data analytics, and 3) multidisciplinary communication occurs on an engineering-preferred platform | - Research Development | Future research should build upon this study by refining nurses' roles in developing artificial intelligence for health-assistive Smart Homes. Expanding sensor types, deploying Smart Homes to diverse populations, and integrating real-time telehealth methods can enhance data collection. Addressing nurses' unique challenges in AI development and exploring innovative multidisciplinary communication approaches will contribute to their effective involvement. The goal is to empower nurses to make significant contributions to advancing AI technologies for aging-in-place and smart health management. |
| 10  2019  USA | - Retrospective study  - 101,766  - Diabetes  (1st diagnosis)  - Not specify age | - To show how one application of machine learning may support nursing work and to discuss how nurses can contribute to improving its relevance and performance - To show the most significant predictors of readmission | - Regularized Logistic Regression, Random Forest, Extreme Gradient Boosting  - Nurses play a pivotal role in ensuring that machine learning algorithms are shaped by their unique knowledge of each patient's personalized context. By combining machine learning with unique nursing knowledge, nurses can provide more visibility to nursing work, advance nursing science, and individualized patient care | - Nurses can contribute to machine learning algorithms by 1) filling data gaps with nursing-relevant data that provide personalized context about the patient, 2) improving data preprocessing techniques, and 3) evaluating potential value in practice - The top 2 significant predictors of readmission in patients with diabetes as a primary diagnosis are number of inpatient visits in the previous year and discharge disposition | - Risk Identification | Future research should empower nurses to enhance machine learning in clinical decision-making, addressing gaps in understanding and exploring ways for nurses to actively contribute to algorithm refinement. Investigating the integration of nursing-relevant data, improving preprocessing, and evaluating practical value are key areas. Research should also focus on how nurses apply "Wisdom-in-Action" to interpret machine learning outputs. The goal is to strengthen collaboration, maximize benefits, and advance nursing science. |
| 11  2022  China | - Tool development  - N/A  - Depression  - N/A | - To develop a separate multi-level scoring cognitive diagnosis model (P-DINO model) - To design a depression detection software based on voice signals to provide a new way for early screening of depression | - Deep learning  - Nurses can utilize machine learning to screen depression, provide psychological counseling and knowledge of mental health | - In the evaluation of depressive symptoms, the performance of the P-DINO model is better than the traditional evaluation of depressive symptoms | - Risk Identification - Develop a nursing care plan | Future research in the realm of individualized nursing care platforms should explore the optimization and integration of artificial intelligence and computer big data technologies. Investigations could focus on refining algorithms within these platforms to enhance personalized care delivery. Additionally, studies might delve into the development of innovative applications that leverage these technologies to further improve the efficiency and effectiveness of individualized nursing care. The aim is to continuously advance the capabilities of these platforms, ensuring they remain at the forefront of healthcare innovation. |

**Reference**

1. Brom H, Carthon MB, Ikeaba U, Chittams J. Applying Machine Learning to Identify Patients at High Risk for Readmissions: An Innovative Approach to Target Nursing Care. *Nursing Research*. Mar-Apr 2019;68(2):E29-E29.

2. Woodnutt S, Allen C, Snowden J, et al. Could artificial intelligence write mental health nursing care plans? *Journal of psychiatric and mental health nursing*. Aug 4 2023;doi:10.1111/jpm.12965

3. Jain A, Way D, Gupta V, et al. Development and Assessment of an Artificial Intelligence-Based Tool for Skin Condition Diagnosis by Primary Care Physicians and Nurse Practitioners in Teledermatology Practices. *JAMA network open*. Apr 2021;4(4)e217249. doi:10.1001/jamanetworkopen.2021.7249

4. Li F, Tao Z, Li R, Qu Z. The early warning research on nursing care of stroke patients with intelligent wearable devices under COVID-19. *Personal and ubiquitous computing*. 2023;27(3):767-779. doi:10.1007/s00779-021-01520-9

5. Hewner S, Smith E, Sullivan SS. Identifying High-Need Primary Care Patients Using Nursing Knowledge and Machine Learning Methods. *Applied clinical informatics*. May 2023;14(03):408-417. doi:10.1055/a-2048-7343

6. Pailaha AD. The Impact and Issues of Artificial Intelligence in Nursing Science and Healthcare Settings. *SAGE open nursing*. Jan-Dec 2023;9:23779608231196847. doi:10.1177/23779608231196847

7. Brom H, Carthon JMB, Ikeaba U, Chittams J. Leveraging Electronic Health Records and Machine Learning to Tailor Nursing Care for Patients at High Risk for Readmissions. *Journal of Nursing Care Quality*. Jan-Mar 2020;35(1):27-33. doi:10.1097/ncq.0000000000000412

8. An R, Chang GM, Fan YY, Ji LL, Wang XH, Hong S. Machine learning-based patient classification system for adult patients in intensive care units: A cross-sectional study. *J Nurs Manag*. Sep 2021;29(6):1752-1762. doi:10.1111/jonm.13284

9. Fritz RL, Dermody G. A nurse-driven method for developing artificial intelligence in "smart" homes for aging-in-place. *Nursing Outlook*. Mar-Apr 2019;67(2):140-153. doi:10.1016/j.outlook.2018.11.004

10. Kwon JY, Karim ME, Topaz M, Currie LM. Nurses "Seeing Forest for the Trees" in the Age of Machine Learning: Using Nursing Knowledge to Improve Relevance and Performance. *CIN: Computers, Informatics, Nursing*. 2019;37(4):203-212. doi:10.1097/CIN.0000000000000508

11. Xu CM, Gao Y, Qi L, et al. Research and Application of Artificial Intelligence and Computer Big Data Technology in the Individualized Nursing Care Platform. 2022:421-425.
